# Supplementary material
Source: PubMed Central journal article supplement (PMC10777266)
Supplement: jama-e2324874-s002.pdf [file jama-e2324874-s002.pdf]

## **Data Sharing Statement**

Nash. Measuring Equity in Readmission as a Distinct Assessment of Hospital Performance. *JAMA*. Published January 09, 2024. doi:10.1001/jama.2023.24874

### **Data**

**Data available:** No
